# Supplementary material for: Protein-induced fluorescence enhancement for a simple and universal detection of protein/small molecule interactions
Source: Royal Society of Chemistry journal article supplement (doi:10.1039/c8ra08515c), 2018-01-01
Supplement: c8ra08515c1.pdf [file c8ra08515c1.pdf]

Supporting Information for

## **Protein-induced fluorescence enhancement for a simple and universal detection of protein/small molecule interactions**

Hansol Kim<sup>a</sup>, Chang Yeol Lee<sup>a</sup>, Jayeon Song<sup>a</sup>, Junhyeok Yoon<sup>a</sup>, Ki Soo Park<sup>b,\*</sup> and Hyun Gyu Park<sup>a,\*</sup>

<sup>a</sup>Department of Chemical and Biomolecular Engineering (BK 21+ program),  
KAIST, Daehak-ro 291, Yuseong-gu, Daejeon 305-701, Republic of Korea

<sup>b</sup>Department of Biological Engineering, College of Engineering,  
Konkuk University, Seoul 05029, Republic of Korea

\* To whom correspondence should be addressed.

E-mail: [hgpark@kaist.ac.kr](mailto:hgpark@kaist.ac.kr) (H.G. Park); Phone: +82-42-350-3932; Fax: +82-42-350-3910.

E-mail: [kskonkuk@gmail.com](mailto:kskonkuk@gmail.com) (K.S. Park); Phone: +82-2-450-3742; Fax: +82-2-450-3742.

**Table S1.** Comparison of this method with previous fluorescent methods for protein/SM interactions.

| Key principle                                | Linear range   | LOD     | Analysis time | Limitations                                                         | Ref.      |
|----------------------------------------------|----------------|---------|---------------|---------------------------------------------------------------------|-----------|
| FRET<br>(NaYF <sub>4</sub><br>Nanocrystals ) | -              | 4.8 nM  | 30 min        | Target protein labeling,<br>synthesis of SM-labeled<br>nanomaterial | S1        |
| FRET<br>(NaYF <sub>4</sub> :Yb,Tm<br>UCNPs)  | 9 to 150 nM    | 3.8 nM  | 30 min        | Synthesis of<br>nanomaterial, multiple<br>steps                     | S2        |
| Fluorescence<br>(Silver<br>nanoclusters)     | 6 to 600 nM    | 2.6 nM  | 140 min       | Synthesis of<br>nanomaterial, use of<br>enzyme, multiple steps      | S3        |
| Fluorescence<br>(Copper<br>nanoclusters)     | 0.5 to 1000 nM | 0.1 nM  | 25 min        | Synthesis of<br>nanomaterial, use of<br>enzyme, multiple steps      | S4        |
| PIFE<br>(cyanine dyes)                       | 0 to 150 nM    | 2.93 nM | 10 min        | -                                                                   | This work |

**Table S2.** DNA sequences employed in this work.

| <b>Strand name</b>               | <b>DNA sequence (5' → 3')</b>  | <b>Modification</b> |
|----------------------------------|--------------------------------|---------------------|
| 3' Cy3-strand (CS <sub>3</sub> ) | TGT ATC TTA TGG TAC TGT AAC TG | 3'-Cy3              |
| BTN-strand (SS <sub>BTN</sub> )  | TTA CAG TAC CAT AAG ATA CA     | 5'-Biotin           |
| FA-strand (SS <sub>FA</sub> )    | TTA CAG TAC CAT AAG ATA CA     | 5'-Folate           |

**Figure S1.** Optimization of the distance ( $d$ ) between BTN and Cy3.  $((F - F_0)/F_0)$  at different positions of BTN relative to Cy3, where  $F_0$  and  $F$  represent the fluorescence intensities at 570 nm in the absence and presence of STV (500 nM), respectively. The reaction time and

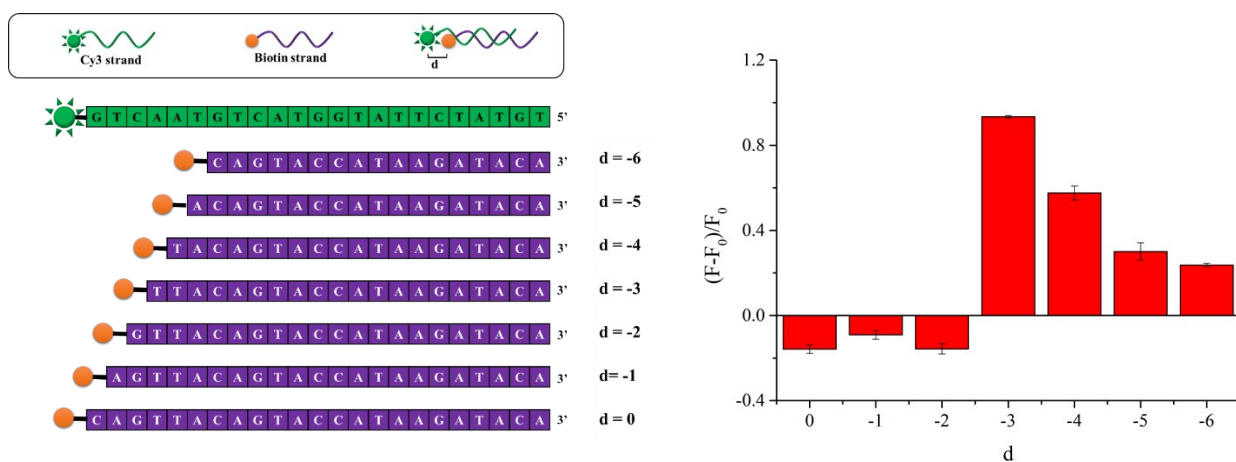

temperature for STV/BTN interaction are 10 min and RT, respectively.

When  $d$  is -0, -1, and -2, the fluorescence signal is decreased. We assume that this reduction is attributed to the fluorescence resonance energy transfer (FRET) from Cy3 to protein based on the fluorescence quenching capabilities of streptavidin. In contrast, as  $d$  changes from -2 to -3, the significant fluorescence enhancement is observed, which is attributed to the PIFE that out-performs FRET in this range. These results are supported by the paper of Hwang et al. in which the authors found that the efficiency of PIFE is largely dependent on the distance between protein and fluorophore<sup>S5</sup>. In this paper, the efficiency of PIFE is

drastically increased from 2 base pair (bp) to 1 bp, clearly confirming that PIFE is quite sensitive to the very short distance (e.g., a single bp).

**Figure S2.** Optimization of the reaction time and temperature. (a) The degree of fluorescence increase  $((F-F_0)/F_0)$  at different reaction times for STV/BTN interaction. The distance and reaction temperature for STV/BTN interaction are -3 and RT, respectively. (b)  $((F-F_0)/F_0)$  at different reaction temperatures for STV/BTN interaction. The distance and reaction time for STV/BTN interaction are -3 and 10 min, respectively.  $F_0$  and  $F$  represent the fluorescence intensities at 570 nm in the absence and presence of STV (500 nM), respectively.

**(a)**

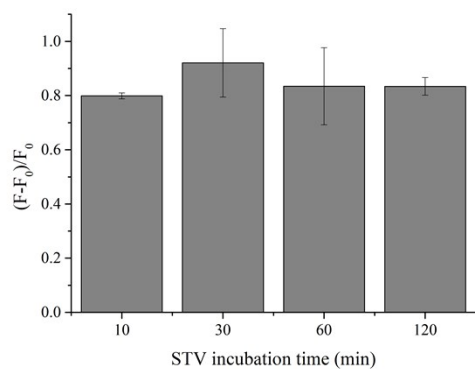

**(b)**

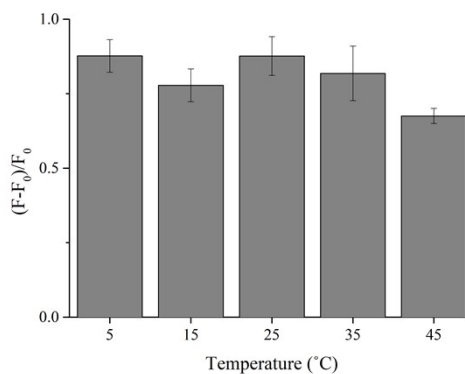

**Figure S3.** General applicability of the proposed strategy. (a) Fluorescence emission spectra and (b) the degree of fluorescence increase  $((F-F_0)/F_0)$  in the presence of FR at varying concentrations, where  $F_0$  and  $F$  represent the fluorescence intensities at 570 nm in the absence and presence of FR, respectively. The inset in (b) shows the linear relationship between  $((F-F_0)/F_0)$  and FR concentration ( $C_{FR}$ ) in the range from 1 nM to 200 nM.

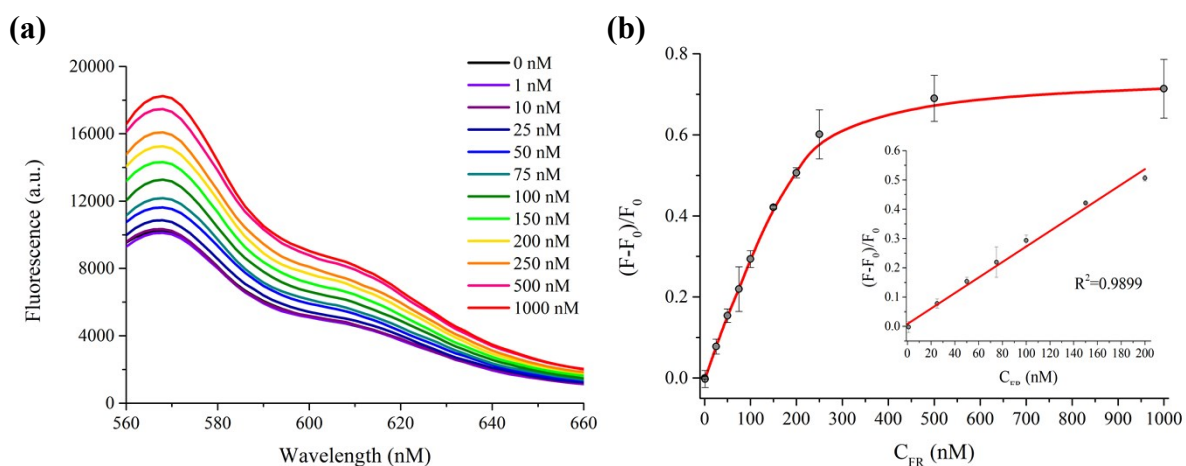

The fluorescence intensities increased with increasing concentrations of FR an excellent linear relationship ( $R^2=0.9899$ ) was established in the range from 1 to 200 nM by the linear equation,  $(F-F_0)/F_0 = 0.0026 \times C_{FR}/\text{nM} + 0.0081$ . LOD was calculated to be 3.00 nM, which is comparable or higher than those from previous fluorescent methods.

**Figure S4.** The linear relationship between the  $F_{570}$  and STV concentration in human serum.

The plot of  $F_{570}$  vs. STV concentration ( $C_{STV}$ ) shows an excellent linear relationship ( $(F-F_0)/F_0 = 0.0018 \times C_{STV}/\text{nM} - 0.0371$ ) in the range of from 25 nM to 300 nM.

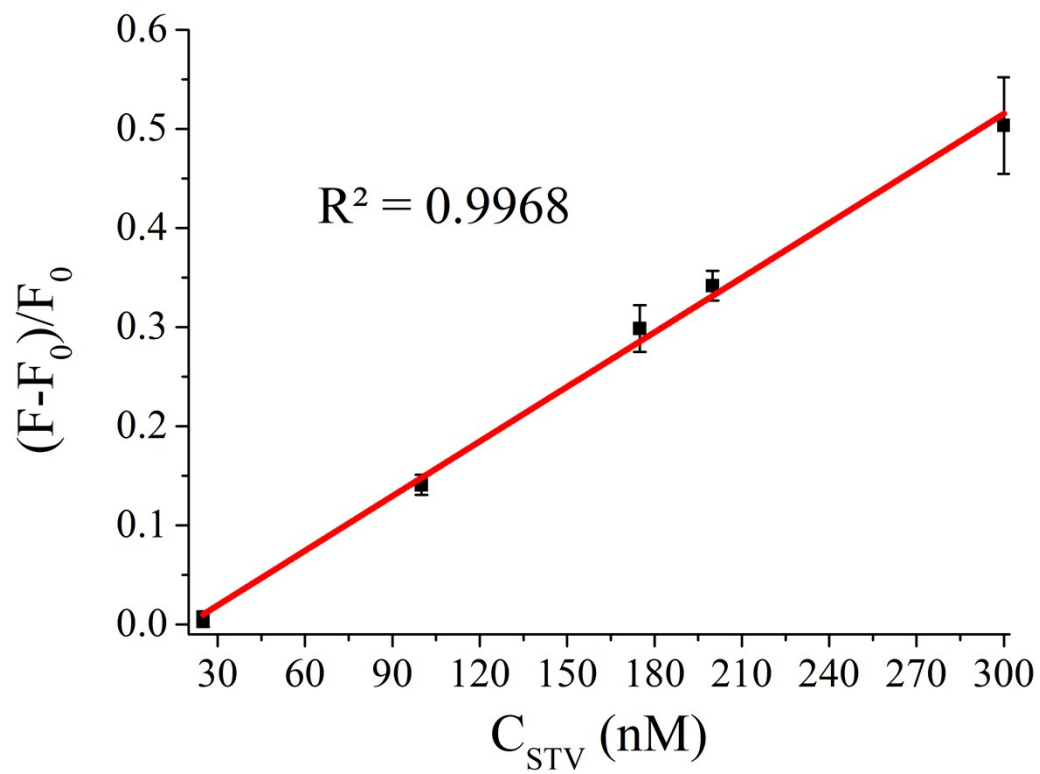

S1. D. Tu, L. Liu, Q. Ju, Y. Liu, H. Zhu, R. Li, X. Chen, *Angew. Chemie - Int. Ed.* 2011, **50**, 6306–6310.

S2. S. Zhang, J. Wang, W. Xu, B. Chen, W. Yu, L. Xu, H. Song, *J. Lumin.*, 2014, **147**, 278–283.

S3. Y. He, B. Jiao, *Microchim. Acta*, 2016, 3183–3189.

S4. H.B. Wang, H.D. Zhang, Y. Chen, Y.M. Liu, *Biosens. Bioelectron.*, 2015, 74, 581–586.

S5. H. Hwang, H. Kim and S. Myong, *Proc. Natl. Acad. Sci. USA*, 2011, 108, 7414–7418.
